# Supplementary material for: Unprecedented Density and Persistence of Feral Honey Bees in Urban Environments of a Large SE-European City (Belgrade, Serbia)
Source: MDPI journal article supplement (doi:10.3390/insects12121127), 2021-12-16
Supplement: s1 [file s1]

## Supplementary Materials 1

**Table S1.** Overview of received reports.

**Table S2.** Outcome of citizens/reporter's interviews.

**Table S3.** Summary of reports by height.

**Table S4.** Summary of reports by nesting/swarming site.

**Table S5.** Comparison of 'lifestyle' features: key differences between feral/wild and managed honey bee colonies.

**Figure S1.** Distribution of reported unmanaged bee colonies and swarms: (a) nesting colonies, (b) swarms, (c) ambiguous or unspecified reports.

**Figure S2.** Distribution of human population density of Belgrade by 'local communities' units, overlayed with distribution of reported feral honey bee units.

**Table S1.** Overview of received reports. When duplicated reports (124) were subtracted there were 1371 reports left. Most of the reports were georeferenced, all except the ones whose location was not possible to retrieve (56). In total 1315 locations/reports were georeferenced.

|                                                    |      |
|----------------------------------------------------|------|
| total number of calls                              | 1745 |
| number of reports of other insects                 | 250  |
| number of reports of honey bees                    | 1495 |
| number of duplicated reports                       | 124  |
| number of reports of honey bees without duplicates | 1371 |
| number of reports without address or location      | 56   |
| number of georeferenced reports                    | 1315 |

**Table S2.** Outcome of citizens/reporter's interviews.

| Number of citizen scientist/attempted communication: 542         |    |                                                                     |    |                                                                                      |     |
|------------------------------------------------------------------|----|---------------------------------------------------------------------|----|--------------------------------------------------------------------------------------|-----|
| Failed<br>171                                                    |    | Reached, but useless information<br>53                              |    | Reached, useful information<br>318                                                   |     |
| Phone number<br>nonexistent<br>anymore                           | 88 | Unreliable info, lack<br>of understanding of<br>the object reported | 34 | Very interested in the<br>topic, willing to<br>cooperate, volunteer<br>in the future | 93  |
| No one answers<br>the phone or<br>replying to SMS<br>messages    | 32 | Person who reported<br>is not available                             | 7  | Neutral toward<br>future cooperation,<br>uninterested in the<br>topic                | 222 |
| Wrongly<br>written/noted<br>phone number in<br>original data set | 29 | Does not remember<br>the details                                    | 5  | Extremely<br>unpleasant                                                              | 3   |
| Voicemail/<br>unavailable<br>phone number                        | 22 | Reluctant to share<br>details/afraid to share                       | 5  |                                                                                      |     |
|                                                                  |    | Person cannot hear<br>well                                          | 2  |                                                                                      |     |

**Table S3.** Summary of reports by height

| Category height      | Number of reports | Colony | Swarm | Ambiguous |
|----------------------|-------------------|--------|-------|-----------|
| 0–1 m                | 22                | 1      | 21    | -         |
| 1–3 m + ground floor | 116               | 7      | 94    | 15        |
| 3–9 m, floor I+II    | 158               | 35     | 110   | 13        |
| 9–15 m, floor III+IV | 75                | 32     | 31    | 12        |
| 15–21 m, floor V+VI  | 11                | 9      | 2     | -         |
| >21 m, floor VII+    | 9                 | 6      | 3     | -         |
| Σ                    | 391               | 90     | 261   | 40        |

**Table S4.** Summary of reports by nesting/swarming site

| Nesting/swarming site     | Swarm | Colony | Ambiguous/<br>unspecified reports |
|---------------------------|-------|--------|-----------------------------------|
| private garden            | 5     | -      | -                                 |
| on the tree               | 277   | 20     | 42                                |
| in the hollow tree        | -     | 18     | -                                 |
| on the ground             | 11    | -      | -                                 |
| on the building/house     | 54    | 1      | 67                                |
| chimney                   | 4     | 32     | 21                                |
| inside the wall/façade    | -     | 182    | 1                                 |
| wall (imprecise)          | 4     | -      | 40                                |
| air conditioner           | 4     | 7      | 7                                 |
| house roof/attic          | 2     | 14     | 5                                 |
| gutter                    | 2     | 2      | 1                                 |
| balcony                   | 11    | 4      | -                                 |
| window                    | 11    | -      | 6                                 |
| wooden window shutter box | 61    | 134    | 96                                |
| ventilation drain         | 1     | 7      | 7                                 |
| electric pole             | 1     | 5      | -                                 |
| Other                     | 15    | 11     | 6                                 |

**Table S5.** Comparison of 'lifestyle' features: a review of key differences in life history traits and living conditions between free-living (feral or wild) honey bee colonies and managed honey bees (compiled from: [1-3]).

| FERAL/WILD HONEY BEES                                                                                     | MANAGED HONEY BEES                                                                                       |
|-----------------------------------------------------------------------------------------------------------|----------------------------------------------------------------------------------------------------------|
| free to swarm                                                                                             | swarming prevented (controlled) by beekeeper                                                             |
| prefer smaller nest cavities (40 L)                                                                       | live in large hives (100 L)                                                                              |
| colonies distant from each other                                                                          | colonies clustered, close proximity to each other                                                        |
| primarily vertical transmission of pathogens and parasites                                                | dominance of horizontal transmission of pathogens and parasites                                          |
| heterogeneous floral diet                                                                                 | mainly uniform floral diet                                                                               |
| no artificial (sugar) feeding                                                                             | regular artificial supplementary feeding with sugar solutions                                            |
| natural selection pressures present (selection of traits that increase survival, pathogen tolerance etc.) | human mediated selective breeding (selection of traits that are economically beneficial to a beekeeper)  |
| rarely disturbed                                                                                          | regular disturbance (through beekeeping activities, honey extraction, beeswax removing, parasite checks) |
| no treatments (chemical or antibiotic)                                                                    | chemical treatments against diseases                                                                     |

Apparently, there are several important differences in 'lifestyle' features and related living conditions between feral and managed honey bee colonies. In various ways, these may generate critical differences in susceptibility to *Varroa* mite [1,2].

Essentially, while feral bees are free to swarm, managed ones are usually prevented by a beekeeper [4]. Generally swarming brings about numerous favorable circumstances, which makes the colonies more tolerant to *Varroa* infestation. First, there is no reproduction (no new brood, nor egg laying) several days before and several weeks after the swarming [4-6]. Consequently, there is also no reproduction for *Varroa* mites during this period, since mite females lay eggs only in bee brood cells [7]. Additionally, when the queen and nearly half of workers leave the old colony by swarming, they take away numerous adult *Varroa* mites on their bodies and thereby reduce the load of mites in the old hive [4,5]. Loftus et al. [4] further noted that bees are more susceptible to *Varroa* mites if they live in large hives than in smaller ones. Since free-living honey bees prefer smaller nest cavities (around 40 L) [5,8] these are filled faster and thus promote frequent swarming [5]. Smaller nests also mean less intensive brood rearing, which consequently reduces *Varroa* reproduction [4]. In contrast, beekeeping practices favor larger hives (>100 L of volume) in which bees can make large stores of honey [4].

Another important difference between managed and feral/wild honey bees is mutual proximity of colonies. In apiaries hives are closely clustered [5], while in naturally occurring colonies they are scattered, more spaced [7]. Consequently, the horizontal transmission of parasites and pathogens, which happens through robbing and drifting in apiaries, is insignificant among the feral colonies [5,7]. Fries and Camazine [9] showed that horizontal transmission of pathogens may be very harmful for the host. The vertical transmission, on the other hand, may lead to less virulent forms of pathogens [10].

Diet and available floral resources make another set of lifestyle differences. Managed bees are often moved (in migratory beekeeping) and offered mainly a monocultural, uniform diet, which results in weakening of individual bee's health and decrease in overall colony health [11]. In addition, managed bees are regularly fed with artificial sugar solutions, which have negative side effects [12].

The relocation of the combs between colonies enables and intensifies horizontal pathogen transmission [9], while regular honey harvest brings frequent disturbances through opening of the hive [13]. On the contrary, feral bees are not exposed to these kinds of stressors.

Recent study [14] on heat transfer differences between man-made nest enclosures and natural cavities showed that hive attributes have significant effect on temperature and humidity inside and hence energy spent on maintaining preferable levels of these two factors; consequently, characteristics of the hive affects behavior and health of the bees.

## References:

1. Powell, J. Learning from wild bees and tree beekeeping [The Beekeepers Quarterly, issue 123]. Available online: <https://www.naturalbeekeepingtrust.org/learning-from-wild-bees-trees> (accessed on 30 October).
2. Kohl, P.L.; Rutschmann, B. The neglected bee trees: European beech forests as a home for feral honey bee colonies. *PeerJ* **2018**, *6*, e4602, doi:10.7717/peerj.4602.
3. Seeley, T.D. *The lives of bees: the untold story of the honey bee in the wild.*; Princeton University Press: 2019.
4. Loftus, J.C.; Smith, M.L.; Seeley, T.D. How honey bee colonies survive in the wild: testing the importance of small nests and frequent swarming. *PLoS ONE* **2016**, *11*, e0150362, doi:10.1371/journal.pone.0150362.
5. Seeley, T.D.; Smith, M.L. Crowding honeybee colonies in apiaries can increase their vulnerability to the deadly ectoparasite *Varroa destructor*. *Apidologie* **2015**, *46*, 716–727, doi:10.1007/s13592-015-0361-2.
6. Seeley, T.D.; Tarpy, D.R.; Griffin, S.R.; Carcione, A.; Delaney, D.A. A survivor population of wild colonies of European honeybees in the northeastern United States: investigating its genetic structure. *Apidologie* **2015**, *46*, 654–666, doi:10.1007/s13592-015-0355-0.
7. Fries, I.; Hansen, H.; Imdorf, A.; Rosenkranz, P. Swarming in honey bees (*Apis mellifera*) and *Varroa destructor* population development in Sweden. *Apidologie* **2003**, *34*, 389–397, doi:10.1051/apido:2003032.
8. Rinderer, T.E.; Tucker, K.W.; Collins, A.M. Nest cavity selection by swarms of European and Africanized honeybees. *J. Apic. Res.* **1982**, *21*, 98–103, doi:10.1080/00218839.1982.11100522.
9. Fries, I.; Camazine, S. Implications of horizontal and vertical pathogen transmission for honey bee epidemiology. *Apidologie* **2001**, *32*, 199–214, doi:10.1051/apido:2001122.
10. Lipsitch, M.; Siller, S.; Nowak, M.A. The evolution of virulence in pathogens with vertical and horizontal transmission. *Evolution* **1996**, *50*, 1729–1741 doi:10.1111/j.1558-5646.1996.tb03560.x.
11. Somme, L.; Moquet, L.; Quinet, M.; Vanderplanck, M.; Michez, D.; Lognay, G.; Jacquemart, A.-L. Food in a row: urban trees offer valuable floral resources to pollinating insects. *Urban Ecosyst* **2016**, *19*, 1149–1161, doi:10.1007/s11252-016-0555-z.
12. Johnson, R.M.; Mao, W.; Pollock, H.S.; Niu, G.; Schuler, M.A.; Berenbaum, M.R. Ecologically appropriate xenobiotics induce cytochrome P450s in *Apis mellifera*. *PLoS ONE* **2012**, *7*, e31051, doi:10.1371/journal.pone.0031051.

13. Büchler, R.; Berg, S.; Le Conte, Y. Breeding for resistance to *Varroa destructor* in Europe. *Apidologie* **2010**, *41*, 393–408, doi:10.1051/apido/2010011.
14. Mitchell, D. Ratios of colony mass to thermal conductance of tree and man-made nest enclosures of *Apis mellifera*: implications for survival, clustering, humidity regulation and *Varroa destructor*. *Int. J. Biometeorol.* **2016**, *60*, 629–638, doi:10.1007/s00484-015-1057-z.



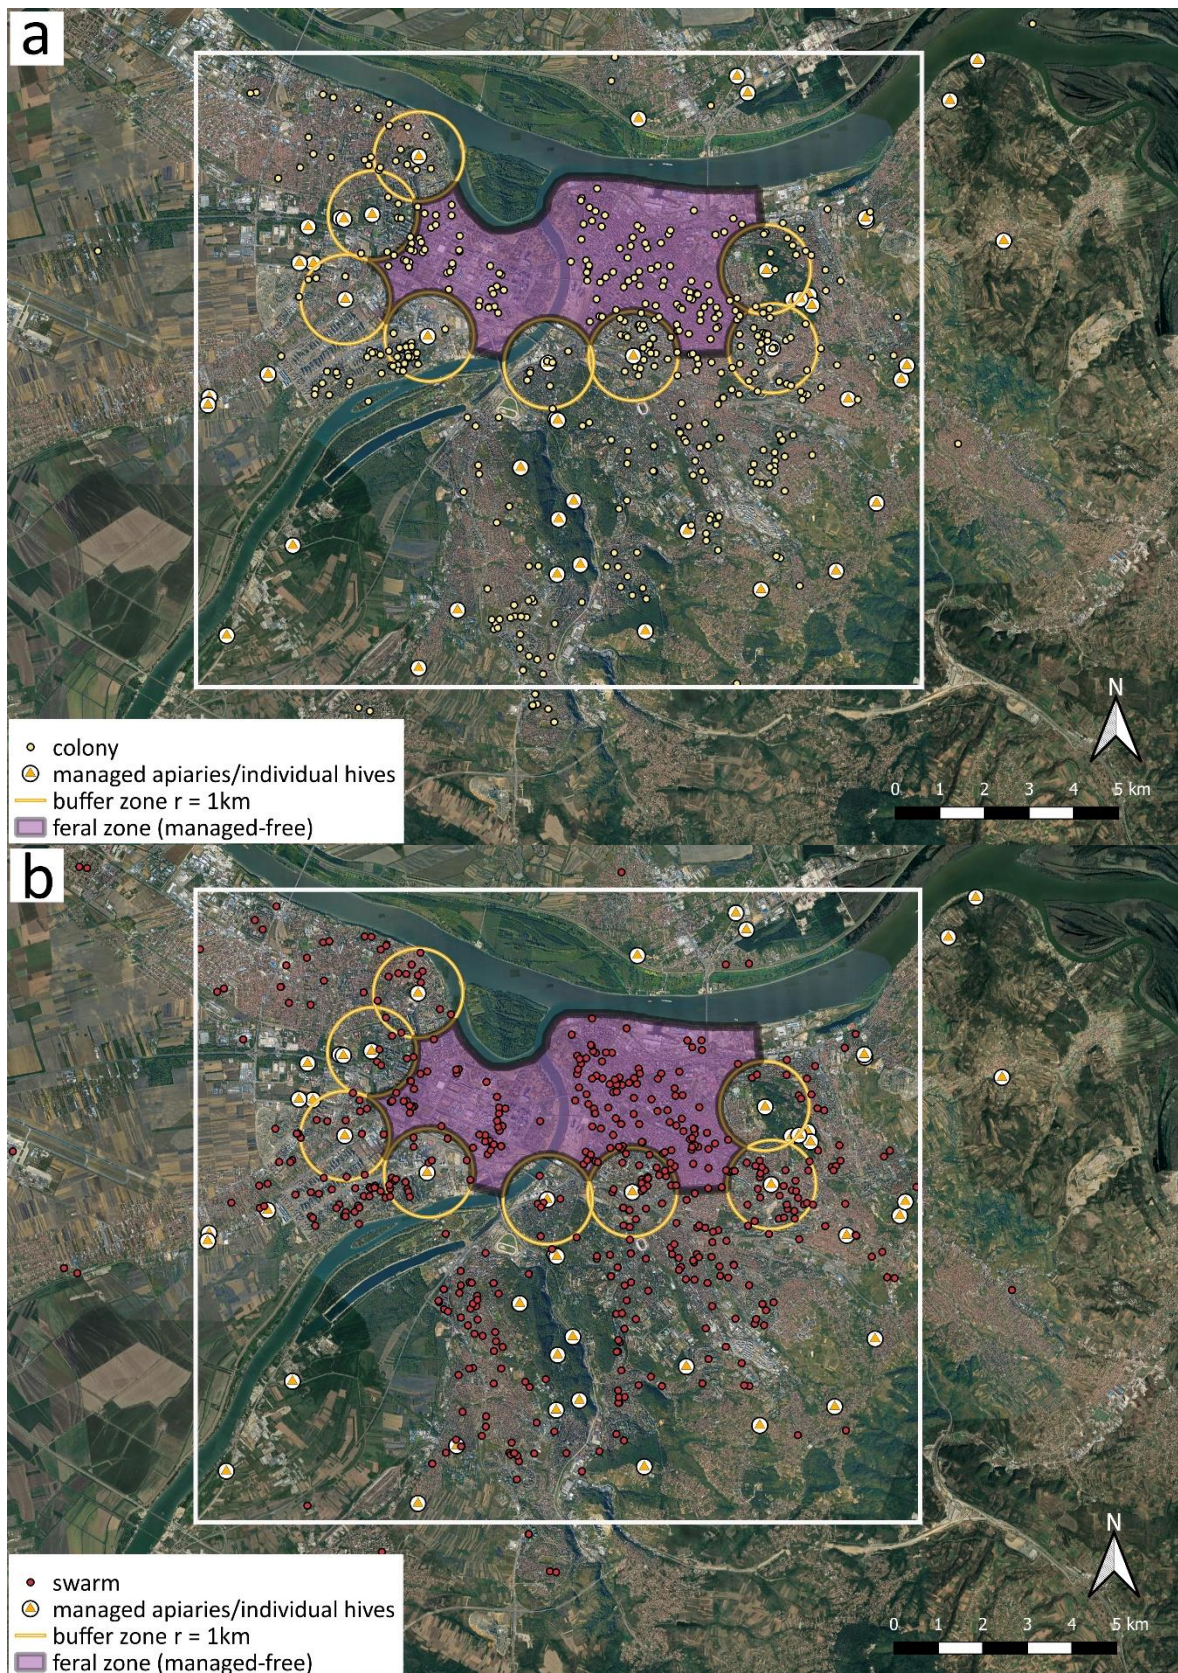



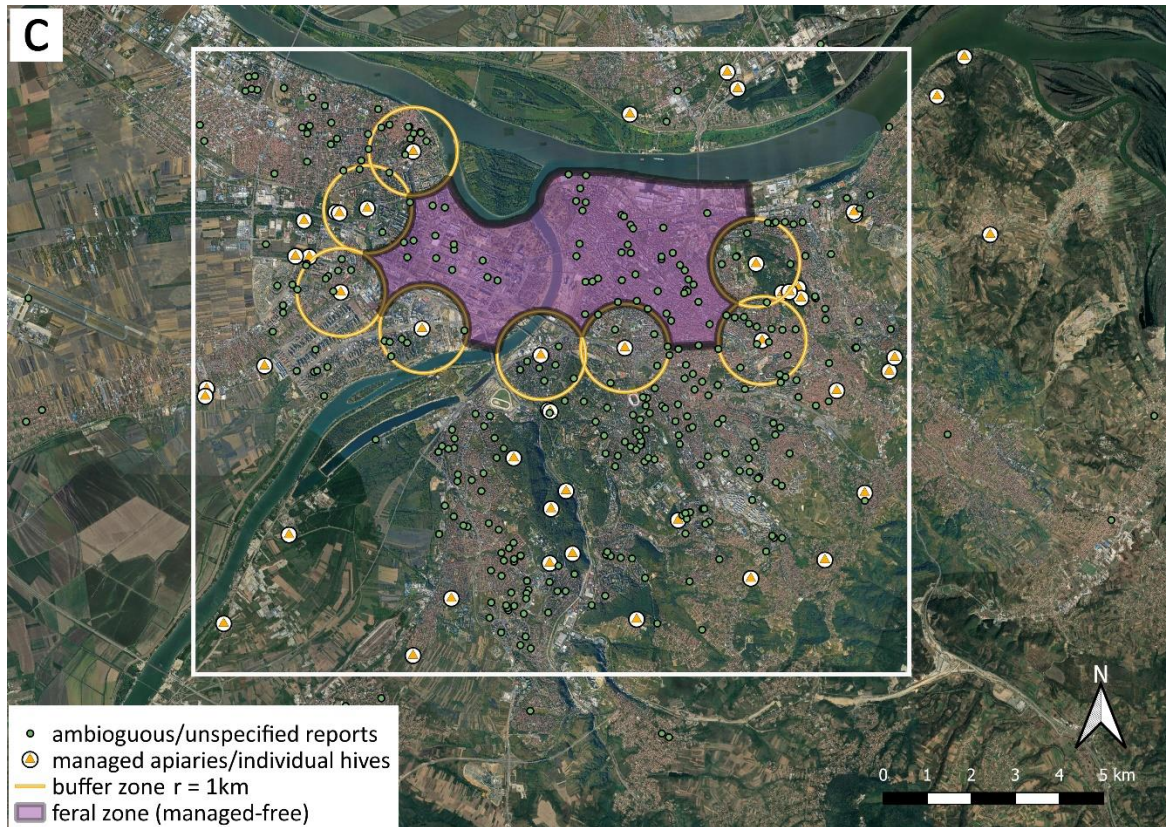

**Figure S1.** Distribution of georeferenced unmanaged bee colonies and swarms, reported in the period 2011–2017 within the wider Belgrade area (24 more remote locations are not shown, being too widely scattered beyond the coverage of this map): a) nesting colonies, b) swarms, c) ambiguous or unspecified reports (either a colony or a swarm). The locations of known managed apiaries (or individual hives) are also shown, with the particular focus on those which surround the urban core area (each shown with circular 'buffer zone' of  $r = 1\text{ km}$ ). The urban core is presumed to harbor mostly the self-sustained feral bee colonies, and consequently, the swarms produced mostly by them; accordingly, we delimited a tentative 'feral zone' (or 'managed-free zone'). The white rectangle (ca.  $16.2 \times 14.4\text{ km}$ ) delimits the area analyzed in more detail – compare the Figures 6–8. (These maps are also available as separate high-resolution images, upon request to J.B.D.)



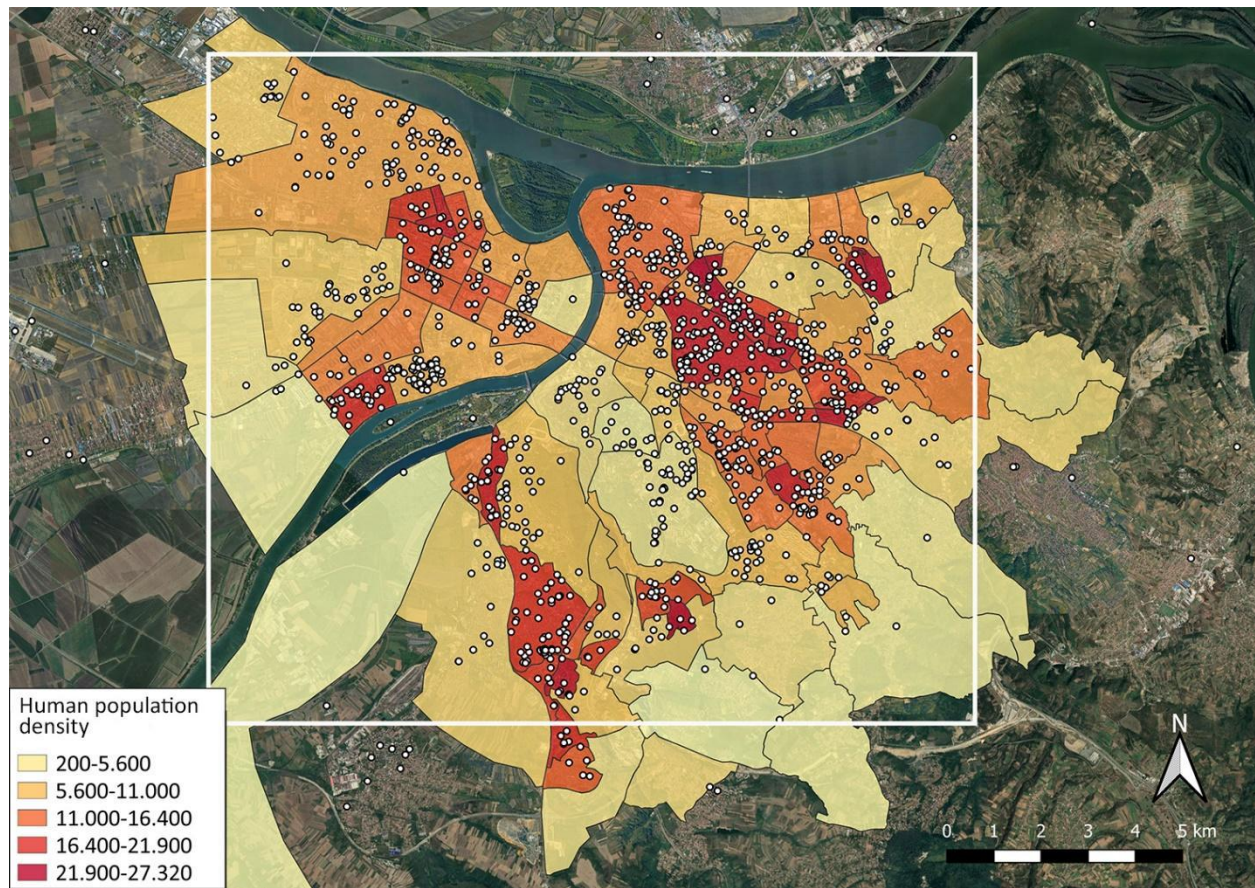

**Figure S2.** Distribution of human population density (per square kilometer) of Belgrade municipalities is shown by lowest available administrative units ('local communities'; data from the latest census – of 2011); only the units included in the analysis are shown. Distribution of reported occurrences of feral honey bee units within the same area is shown combined (colony+swarm+unknown), localities not overlapping with census units were not used in analysis. White rectangle denotes the same area as in other maps (Figures 2, 6–8, S1).
